# Supplementary material for: Rate-dependence of the compressive and tensile strength of granites
Source: Copernicus journal article supplement (doi:10.5194/adgeo-62-11-2023), 2023-10-05
Supplement: Supplementary file 1 [file adgeo-62-11-2023-supplement.zip]

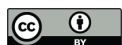

## *Supplement of*

# **Rate-dependence of the compressive and tensile strength of granites**

**Jackie E. Kendrick et al.**

*Correspondence to:* Jackie E. Kendrick ([jackie.kendrick@lmu.de](mailto:jackie.kendrick@lmu.de))

- [adgeo-62-11-2023-supplement-title-page.pdf](#)
- Kendrick et al. Supp info
  - Compression tests
    - \* [G603\\_01.xlsx](#)
    - \* [G603\\_02.xlsx](#)
    - \* [G603\\_03.xlsx](#)
    - \* [G603\\_04.xlsx](#)
    - \* [G603\\_05.xlsx](#)
    - \* [G603\\_06.xlsx](#)
    - \* [G603\\_07.xlsx](#)
    - \* [G603\\_08.xlsx](#)
    - \* [G603\\_09.xlsx](#)
    - \* [G603\\_10.xlsx](#)
    - \* [G603\\_11.xlsx](#)
    - \* [G603\\_12.xlsx](#)
    - \* [G603\\_13.xlsx](#)
    - \* [G603\\_14.xlsx](#)
    - \* [G603\\_15.xlsx](#)
    - \* [G603\\_16.xlsx](#)
    - \* [G603\\_17.xlsx](#)
    - \* [G603\\_18.xlsx](#)
  - Tension tests
    - \* [G603\\_D01.xlsx](#)
    - \* [G603\\_D02.xlsx](#)
    - \* [G603\\_D03.xlsx](#)
    - \* [G603\\_D04.xlsx](#)
    - \* [G603\\_D05.xlsx](#)
    - \* [G603\\_D06.xlsx](#)

- \* G603\_D07.xlsx
- \* G603\_D08.xlsx
- \* G603\_D09.xlsx
- \* G603\_D10.xlsx
- \* G603\_D11.xlsx
- \* G603\_D12.xlsx
- \* G603\_D16.xlsx
- \* G603\_D17.xlsx
- \* G603\_D18.xlsx
- \* G603\_D19.xlsx
- Young’s modulus
  - \* G603\_01\_corrected.png
  - \* G603\_02\_corrected.png
  - \* G603\_03\_corrected.png
  - \* G603\_04\_corrected.png
  - \* G603\_05\_corrected.png
  - \* G603\_06\_corrected.png
  - \* G603\_07\_corrected.png
  - \* G603\_08\_corrected.png
  - \* G603\_09\_corrected.png
  - \* G603\_10\_corrected.png
  - \* G603\_11\_corrected.png
  - \* G603\_12\_corrected.png
  - \* G603\_13\_corrected.png
  - \* G603\_14\_corrected.png
  - \* G603\_15\_corrected.png
  - \* G603\_16\_corrected.png
  - \* G603\_17\_corrected.png
  - \* G603\_18\_corrected.png
  - \* YM\_matlab\_code.m

The copyright of individual parts of the supplement might differ from the article licence.
